# Supplementary material for: GCIceNet: a graph convolutional network for accurate classification of water phases
Source: Royal Society of Chemistry journal article supplement (doi:10.1039/d0cp03456h), 2020-01-01
Supplement: d0cp03456h1.pdf [file d0cp03456h1.pdf]

## Supplementary Information

QHwan Kim, Joon-Hyuk Ko, Sunghoon Kim, and Wonho Jhe\*

*Department of Physics and Astronomy, Institute of Applied Physics, Seoul National  
University, Gwanak-gu, Seoul 08826, Republic of Korea.*

E-mail: whjhe@snu.ac.kr

Phone: +82-28806600

### Local Order Parameters

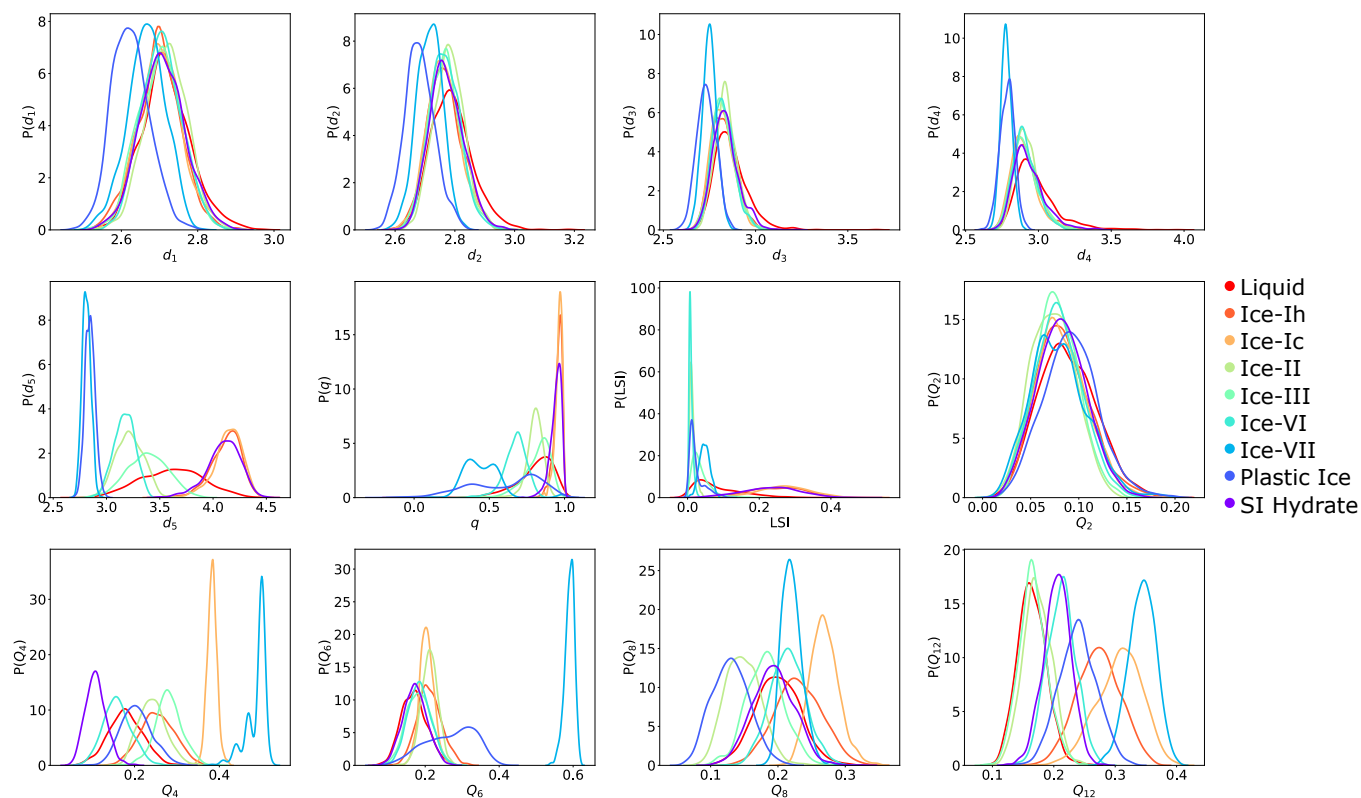

Figure S1: Distribution of order parameters composing feature vector.
